# Supplementary material
Source: Atypon-hosted journal article supplement (doi:10.1287/ijoc.2023.0372)
Supplement: ijoc.2023.0372.cd.zip [file diagram2.pdf › 2023.0372-main/results/diagram2.pdf]

Rating Behavior Driven by Latent Motivation and Contextual Preferences

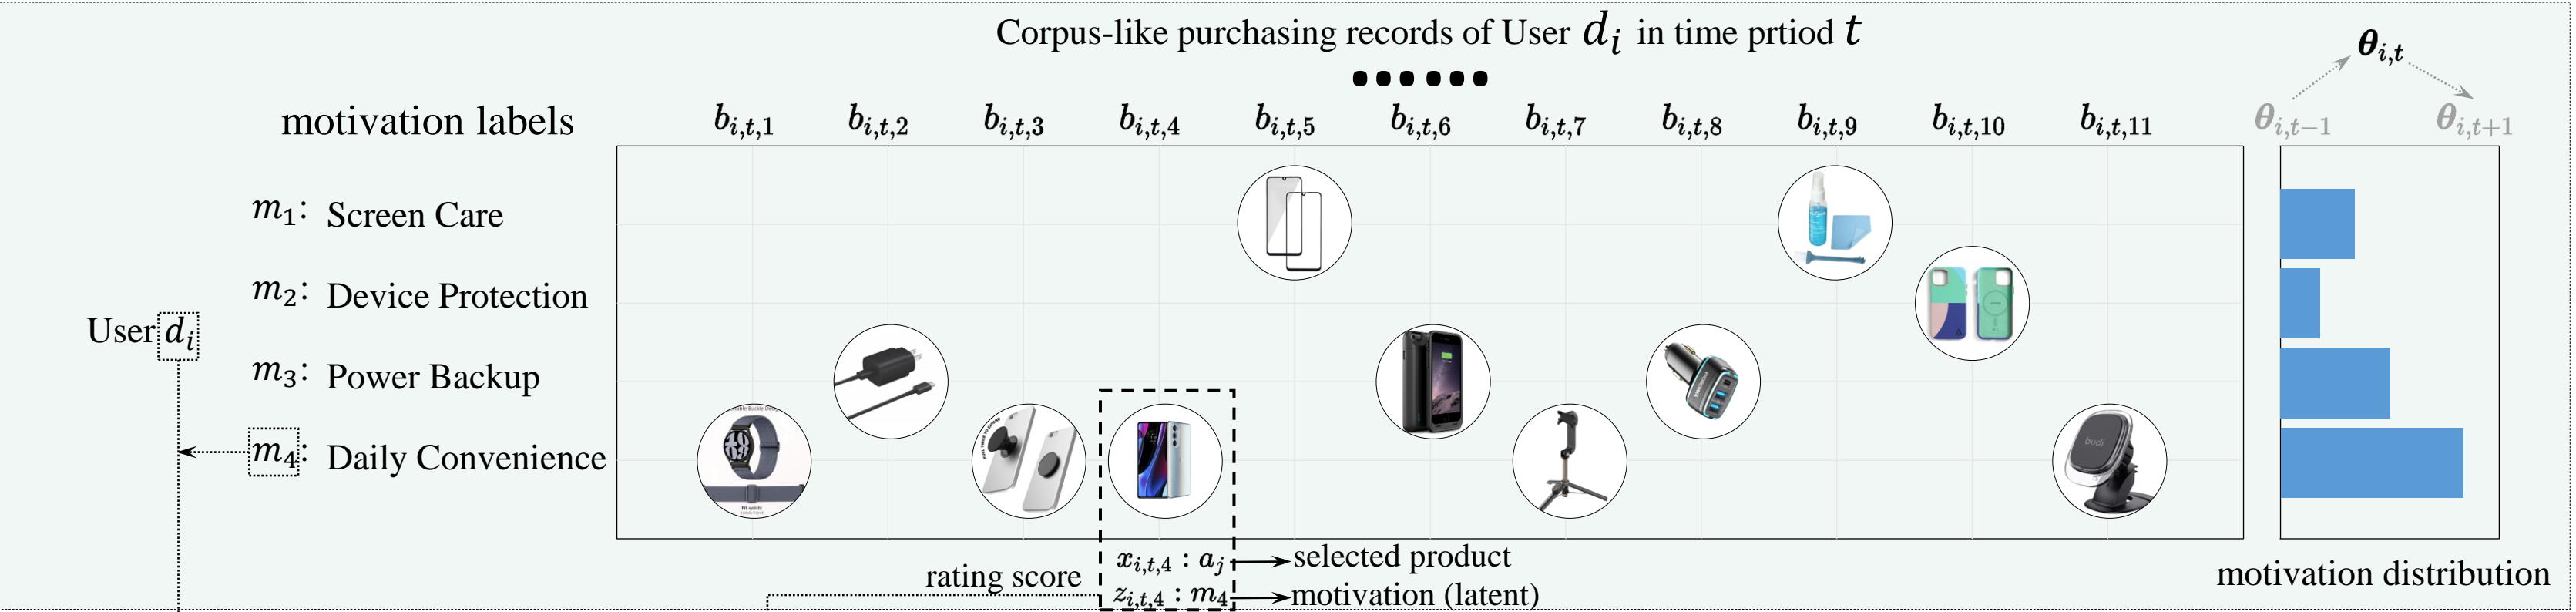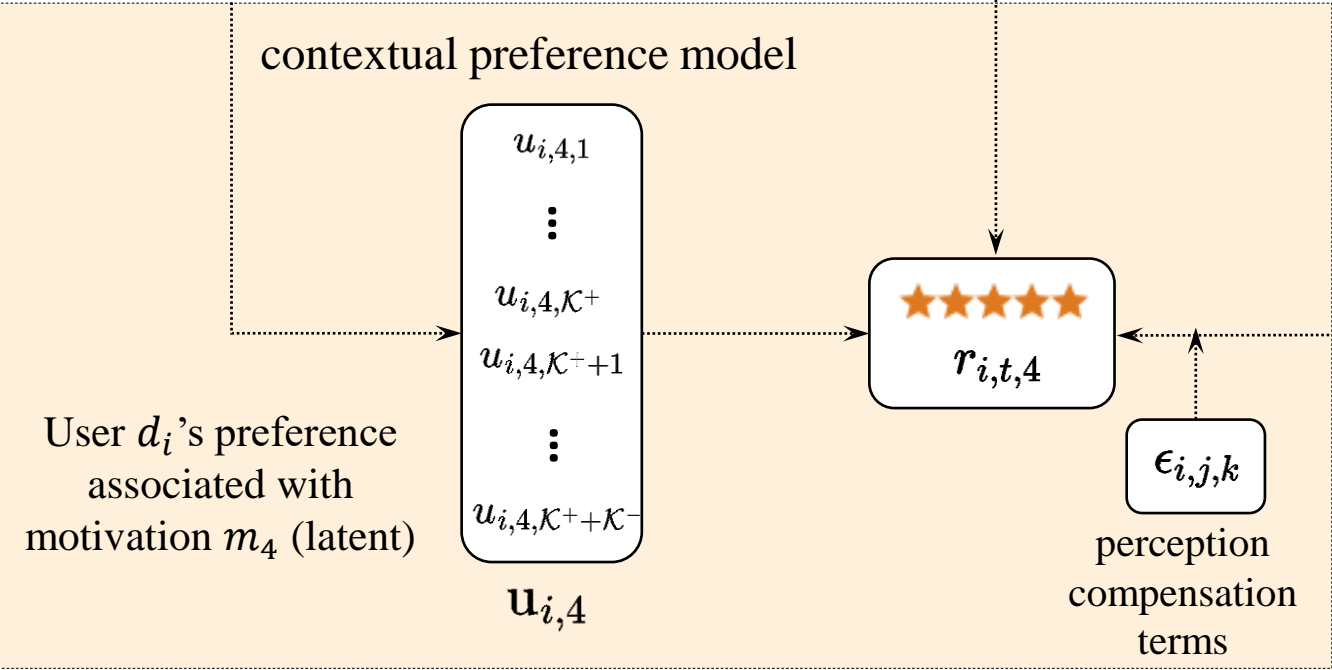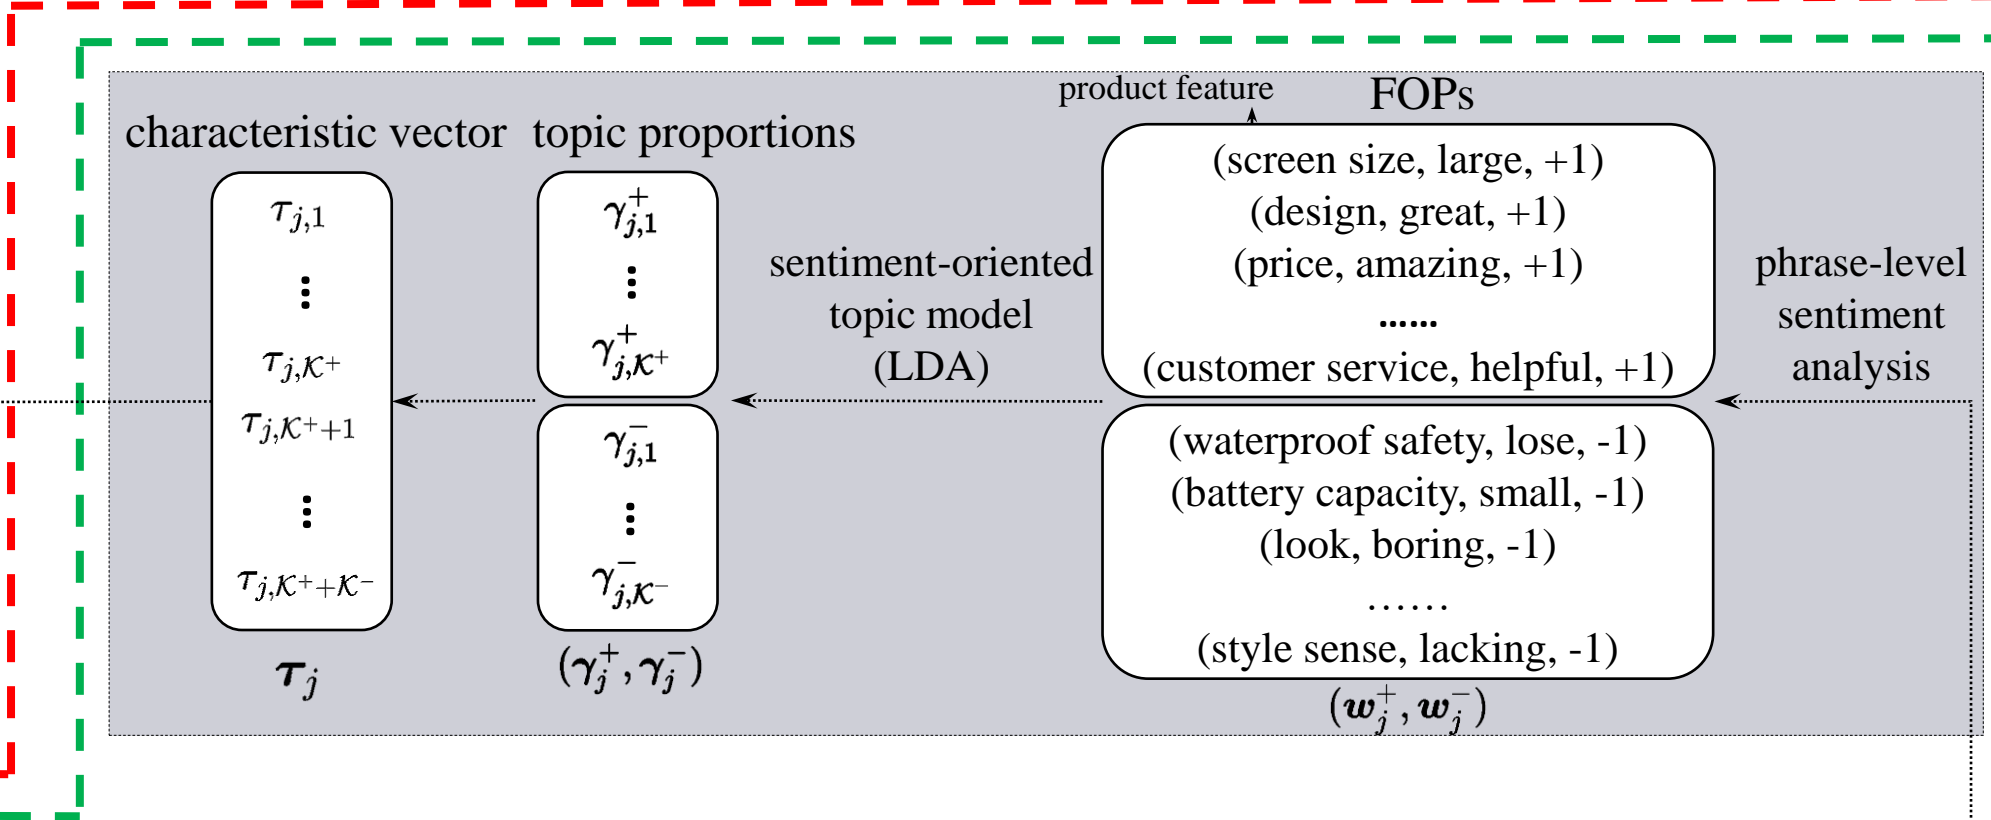

Product  $a_j$

Color: Mineral Gray | Verified Purchase

The phone itself is fine I guess but I thought we all agreed when iPhones removed their headphones jack that it's stupid and shouldn't be done. I wasn't even looking for that info in the description because I assumed it had one but it doesn't. It doesn't have a sd card slot either, so if you want more storage you'll have to buy a new phone or pay for cloud storage which really sucks. I would NOT have bought it if I'd known it doesn't have a headphone jack or sd slot

Color: Cosmos Blue | Verified Purchase

I have been buying Motorola since 2000, and this phone has a lot of fun add-ons that younger humans would appreciate. I like the phone alot and I'm an avid texter and it will occasionally just pop a period into what I am texting. I have some time off and think I can fix this small issue but this phone is fast and it has a one day battery. I'm used to three days, so it's an every night. LOL!

Color: Mineral Gray | Verified Purchase

Used this phone for 10 months now. I only have a complaint about the camera app. it seems to be buggy and slow once started up the app. it does smooth out if you leave the app open for 20 seconds. Other then that this phone is fantastic for every day usage. the battery last me most of the day and it does charge fast.

Color: Eclipse Black | Verified Purchase

The phone is not compatible with cgms like dex com.It is Google based .It is hard to navigate does not have good signal. Causing delays in receipt of text messages . The reason I am returning the product is it's not cgm compatible.

Color: Mineral Gray | Verified Purchase

Purchased as a gift for my bf. He LOVES it. We use it on the Verizon Wireless network and haven't had any issues at all. Phone holds a charge for a long time. Much longer than his iPhone did. I can hear him clearly on this phone too...not like his iPhone. He loves it and you couldn't beat the price with overnight delivery.

Color: Mineral Gray | Verified Purchase

This model is defective and will eventually stop registering the Sim card and will only work on wifi. If you don't believe me, go to reddit and look at the countless others who've had the same problem. When it works, it's fine, but I had to buy a new phone just four months after buying this one. I've always loved motorola phones but will never buy another. It's ridiculous they're still selling this.

Review corpus of Product  $a_j$

The block contains several user reviews for a product, each with a color and a verified purchase status. The reviews discuss various aspects of the product, such as storage, battery life, and compatibility.

Construction of Characteristic Vectors Extracted from Reviews
