# Supplementary material
Source: Atypon-hosted journal article supplement (doi:10.1287/ijoc.2023.0372)

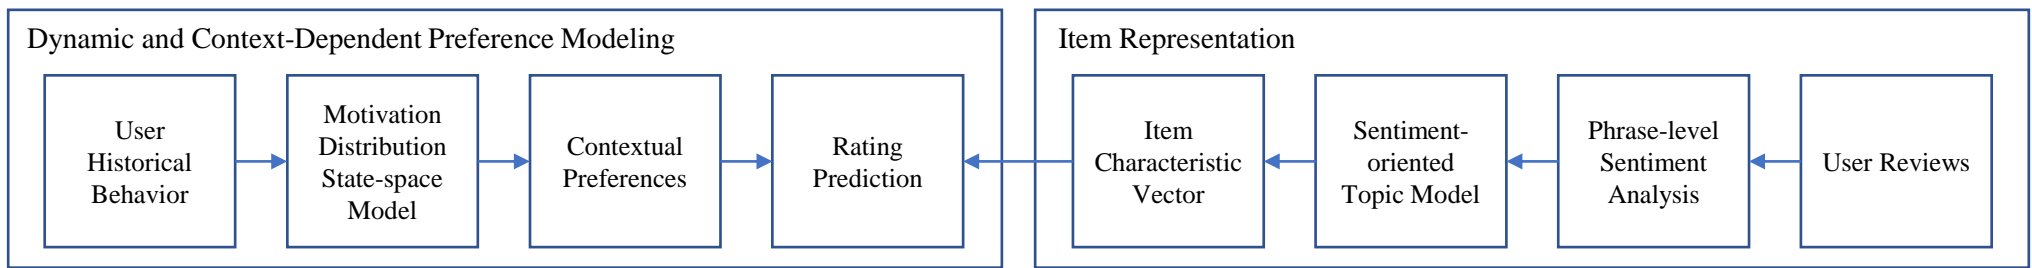

Supplement: ijoc.2023.0372.cd.zip [file framework.pdf › 2023.0372-main/results/framework.pdf]

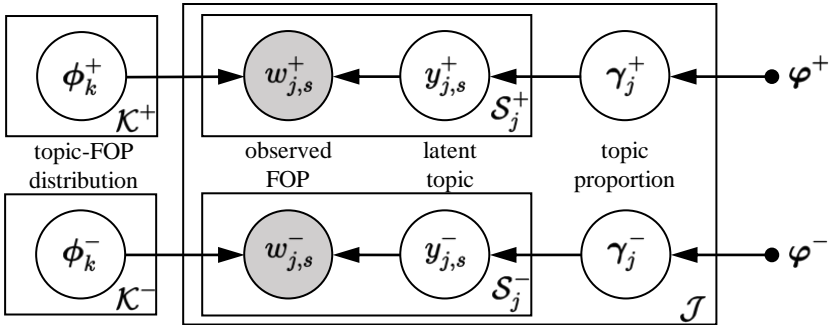

Supplement: ijoc.2023.0372.cd.zip [file model1.pdf › 2023.0372-main/results/model1.pdf]

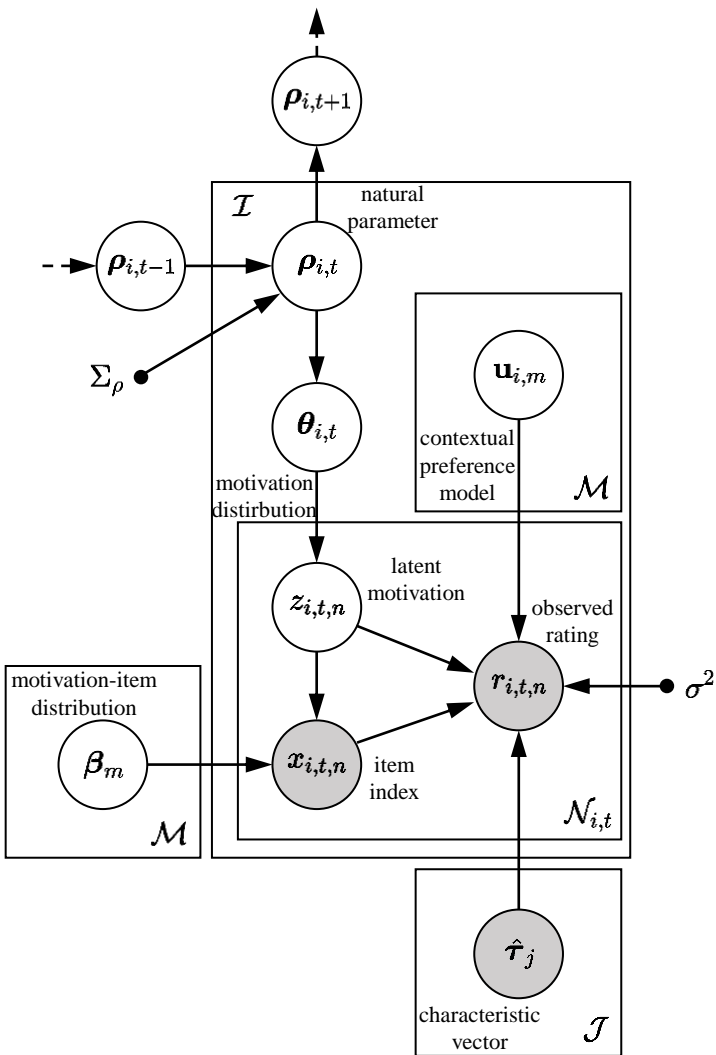

Supplement: ijoc.2023.0372.cd.zip [file model2.pdf › 2023.0372-main/results/model2.pdf]
